# Supplementary material
Source: PubMed Central journal article supplement (PMC10203287)
Supplement: NIHMS1893603-supplement-320991_Major_Resources_Table.pdf [file NIHMS1893603-supplement-320991_Major_Resources_Table.pdf]

## Major Resources Table

In order to allow validation and replication of experiments, all essential research materials listed in the Methods should be included in the Major Resources Table below. Authors are encouraged to use public repositories for protocols, data, code, and other materials and provide persistent identifiers and/or links to repositories when available. Authors may add or delete rows as needed.

### Animals (in vivo studies)

| Species             | Vendor or Source   | Background Strain                                       | Sex             | Persistent ID / URL                                                               |
|---------------------|--------------------|---------------------------------------------------------|-----------------|-----------------------------------------------------------------------------------|
| <i>Mus musculus</i> | Jackson laboratory | B6.129P2-<br><i>ApoE<sup>tm1Unc</sup>/J</i> ##(apoE-/-) | male;<br>female | <a href="https://www.jax.org/strain/002052">https://www.jax.org/strain/002052</a> |

### Genetically Modified Animals

|                 | Species             | Vendor or Source   | Background Strain                                       | Other Information | Persistent ID / URL                                                               |
|-----------------|---------------------|--------------------|---------------------------------------------------------|-------------------|-----------------------------------------------------------------------------------|
| Parent - Male   | <i>Mus musculus</i> | Jackson laboratory | B6.129P2-<br><i>ApoE<sup>tm1Unc</sup>/J</i> ##(apoE-/-) |                   | <a href="https://www.jax.org/strain/002052">https://www.jax.org/strain/002052</a> |
| Parent - Female | <i>Mus musculus</i> | Jackson laboratory | B6.129P2-<br><i>ApoE<sup>tm1Unc</sup>/J</i> ##(apoE-/-) |                   | <a href="https://www.jax.org/strain/002052">https://www.jax.org/strain/002052</a> |

### Antibodies

| Target antigen | Vendor or Source | Catalog # | Working concentration | Lot # (preferred but not required) | Persistent ID / URL |
|----------------|------------------|-----------|-----------------------|------------------------------------|---------------------|
|                |                  |           |                       |                                    |                     |
|                |                  |           |                       |                                    |                     |

### DNA/cDNA Clones

| Clone Name | Sequence | Source / Repository | Persistent ID / URL |
|------------|----------|---------------------|---------------------|
|            |          |                     |                     |
|            |          |                     |                     |

### Cultured Cells

| Name | Vendor or Source | Sex (F, M, or unknown) | Persistent ID / URL |
|------|------------------|------------------------|---------------------|
|      |                  |                        |                     |
|      |                  |                        |                     |

### Data & Code Availability

| Description                                | Source / Repository                                                                                                    | Persistent ID / URL                                                                                                                                                                       |
|--------------------------------------------|------------------------------------------------------------------------------------------------------------------------|-------------------------------------------------------------------------------------------------------------------------------------------------------------------------------------------|
| Strong Heart Study data                    | Available upon request at the SHS website<br><a href="https://strongheartstudy.org/">https://strongheartstudy.org/</a> | <a href="https://strongheartstudy.org">https://strongheartstudy.org</a>                                                                                                                   |
| Framingham Heart Study data                | dbGaP accession number<br>phs000724.v8.p12                                                                             | <a href="https://www.ncbi.nlm.nih.gov/projects/gap/cgi-bin/study.cgi?study_id=phs000724.v8.p12">https://www.ncbi.nlm.nih.gov/projects/gap/cgi-bin/study.cgi?study_id=phs000724.v8.p12</a> |
| Women's Health Initiative data             | dbGaP accession number<br>phs000200.v11.p3                                                                             | <a href="https://www.ncbi.nlm.nih.gov/projects/gap/cgi-bin/study.cgi?study_id=phs000200.v11.p3">https://www.ncbi.nlm.nih.gov/projects/gap/cgi-bin/study.cgi?study_id=phs000200.v11.p3</a> |
| Multi-Ethnic Study of Atherosclerosis data | Available upon request at TopMed<br>( <a href="https://topmed.nhlbi.nih.gov/">https://topmed.nhlbi.nih.gov/</a> )      | <a href="https://topmed.nhlbi.nih.gov/">https://topmed.nhlbi.nih.gov/</a>                                                                                                                 |

**Other**

| Description | Source / Repository | Persistent ID / URL |
|-------------|---------------------|---------------------|
|             |                     |                     |
|             |                     |                     |
|             |                     |                     |

## ARRIVE GUIDELINES

The ARRIVE guidelines (<https://arriveguidelines.org/>) are a checklist of recommendations to improve the reporting of research involving animals. Key elements of the study design should be included below to better enable readers to scrutinize the research adequately, evaluate its methodological rigor, and reproduce the methods or findings.

### Study Design

| Groups            | Sex                                        | Age                               | Number (prior to experiment) | Number (after termination)                  | Littermates (Yes/No) | Other description |
|-------------------|--------------------------------------------|-----------------------------------|------------------------------|---------------------------------------------|----------------------|-------------------|
| Group 1 (Control) | F and M (breeding pairs)<br>F and M (pups) | 5 week-old dams; 18 week-old pups | 6 dams                       | 6 dams plus an average of 5 pups per litter | No                   |                   |
| Group 2 (arsenic) | F and M (breeding pairs)<br>F and M (pups) | 5 week-old dams; 18 week-old pups | 6 dams                       | 6 dams plus an average of 6 pups per litter | No                   |                   |

The tissues used in this manuscript were originally generated as part of a study previously published (Negro Silva et al EHP 2021) to assess early-life arsenic exposure and atherosclerotic plaque development. In this study, male and female mice were randomly assigned to one of 12 breeding pairs: 6 control and 6 arsenic. Arsenic exposure to the dam continued after birth of pups, until one week prior to weaning. All pups were then maintained on tap water until end point (18 weeks of age). For the purposes of this study, one mouse of each sex from each litter were selected for whole genome bisulfite sequencing.

**Sample Size:** We based our sample size on our experience with this model in the post-natal setting where 8-10 mice/group were needed. We determined that 6 dams would generate sufficient pups of each sex to enable assessment of plaque size (previously published Negro Silva et al EHP 2021) and determine methylation patterns.

**Inclusion Criteria:** all animals were included

**Exclusion Criteria:** no animals were excluded

**Randomization:** Breeding pairs were randomized to either control or arsenic treatment

**Blinding:** Statistician was blinded to downstream analyses
