# Supplementary material
Source: PubMed Central journal article supplement (PMC10203287)
Supplement: NIHMS1893603-supplement-Electronic_Disclosure_Form_for_Kurt_Lohman.pdf [file NIHMS1893603-supplement-Electronic_Disclosure_Form_for_Kurt_Lohman.pdf]

# Kurt Lohman

**Disclosure Purpose:** CIRCRES/2022/320991D

## Summary of Interests

I do not have any interests to disclose at this time.

## Additional Questions:

- 1. Are you the corresponding author?**  
No.
- 2. I confirm I have disclosed all direct support for the present manuscript (e.g. funding, provision of study materials, medical writing, article processing charges, etc.) There is no time limit for this item.**  
Yes
- 3. Was any individual paid to provide professional writing assistance with this manuscript?**  
No.
- 4. Have you or your institution received equipment, materials, drugs, or services in direct support of the work in the manuscript (without time limit) not disclosed above?**  
No.
- 5. In the past 36 months, have you received equipment, materials, drugs, medical writing, gifts or other services from for-profit or not-for-profit third parties whose interests may be affected by the content of the manuscript not disclosed above?**  
No.
- 6. Are there other financial or non-financial interests that readers could perceive to have influenced, or that give the appearance of potentially influencing, what you wrote in the submitted work not disclosed above.**  
No.

## Certification

I certify that the information provided in this disclosure is complete and accurate.
